# Supplementary material for: Non-linear photocatalytic reaction induced by visible-light surface-plasmon resonance absorption of gold nanoparticles loaded on titania particles
Source: Royal Society of Chemistry journal article supplement (doi:10.1039/c3cc41122b), 2013-01-01
Supplement: c3cc41122b.pdf [file c3cc41122b.pdf]

Supplementary information for

**Multiphoton photocatalytic reaction induced by visible-light surface-plasmon resonance absorption of gold nanoparticles loaded on titania particles**

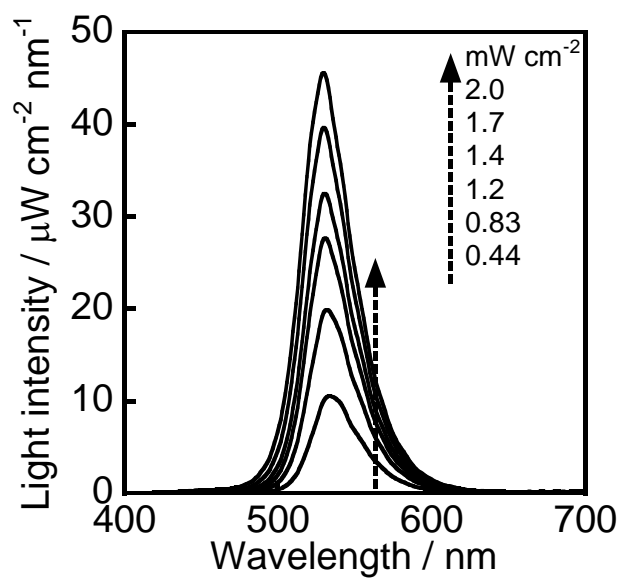

**Figure S1** Light intensity of visible light irradiated to reaction systems from a green LED.
